# Supplementary material for: Confirmed Autochthonous Case of Human Alveolar Echinococcosis, Italy, 2023
Source: PubMed Central journal article supplement (PMC10826761; doi:10.3201/eid3002.231527), 2024-02
Supplement: 23-1527-Techapp-s1.pdf [file 23-1527-Techapp-s1.pdf]

*EID cannot ensure accessibility for supplementary materials supplied by authors. Readers who have difficulty accessing supplementary content should contact the authors for assistance.*

## Confirmed Autochthonous Case of Human Alveolar Echinococcosis, Italy, 2023

### Appendix

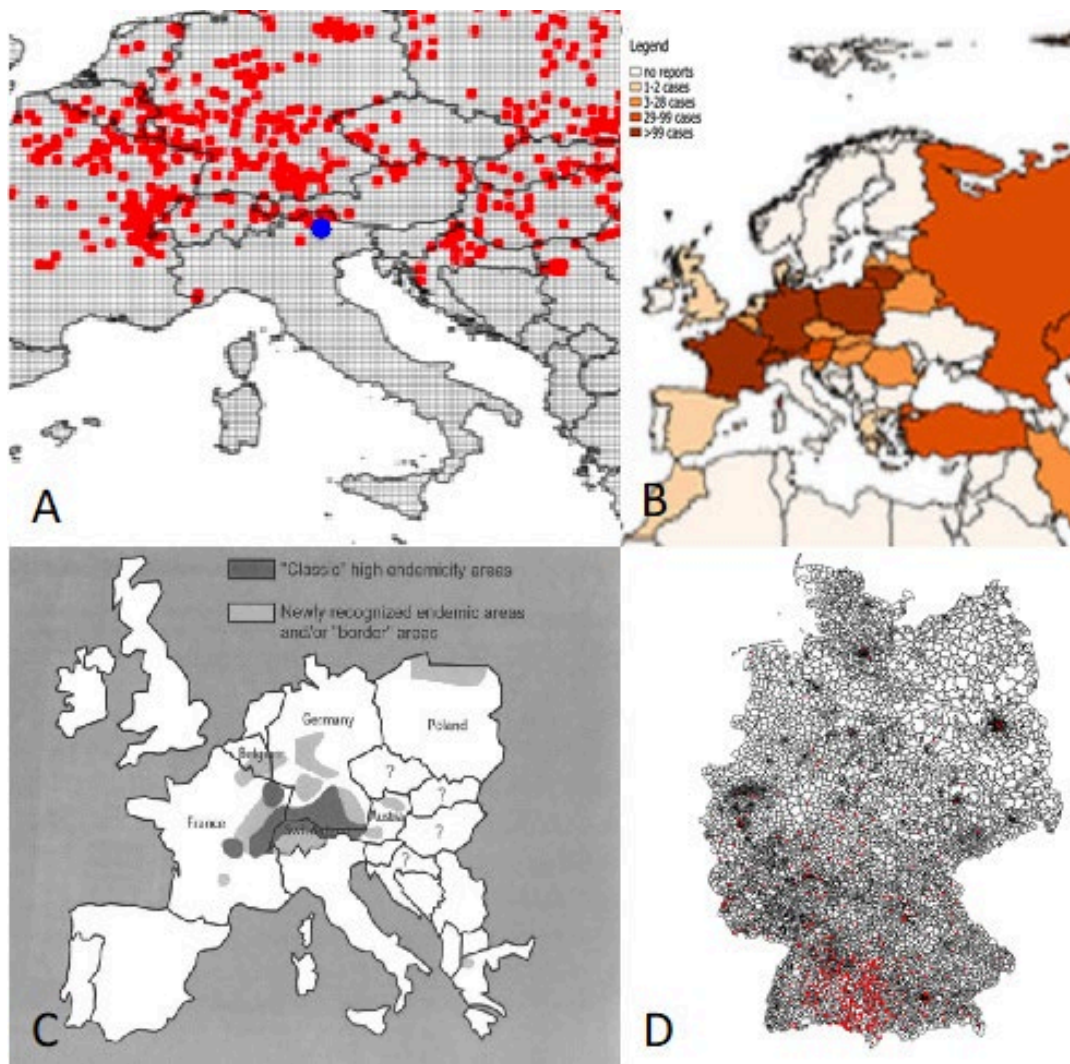

**Appendix Figure.** Maps of the distribution of *E. multilocularis* in Italy and adjacent countries. (A) *E. multilocularis* infection in wild carnivores (red dots) and living place of our human AE case (blue dot);

modified from reference 3 in the main text. (B) Distribution of AE in humans in central Europe according to the published literature 2001–2018; modified from reference 11 in the main text. (C) Endemic areas for human alveolar echinococcosis in Europe according to data from the European registry of alveolar echinococcosis (EurEchinoReg); from (20). (D) Distribution of AE cases in Germany based on data from the German database for AE in 2016; from (21).

### **Additional References**

16. Stijnis K, Dijkmans AC, Bart A, Brosens LA, Muntau B, Schoen C, et al. *Echinococcus vogeli* in immigrant from Suriname to the Netherlands. *Emerg Infect Dis*. 2015;21:528–30. [PubMed https://doi.org/10.3201/eid2103.141205](https://doi.org/10.3201/eid2103.141205)
17. Stojkovic M, Mickan C, Weber TF, Junghanss T. Pitfalls in diagnosis and treatment of alveolar echinococcosis: a sentinel case series. *BMJ Open Gastroenterol*. 2015;2:e000036. [PubMed https://doi.org/10.1136/bmjgast-2015-000036](https://doi.org/10.1136/bmjgast-2015-000036)
18. Crotti S, Brustenga L, Cruciani D, Bonelli P, D’Avino N, Felici A, et al. Molecular screening of *Echinococcus* spp. and other cestodes in wild carnivores from Central Italy. *Vet Sci*. 2023;10:318. [PubMed https://doi.org/10.3390/vetsci10050318](https://doi.org/10.3390/vetsci10050318)
19. Cassini R, Canali M, Tamarozzi F, Angheben A, Capelli G, Gobbi F, et al. A One-Health evaluation of the burden of cystic echinococcosis and its prevention costs: case study from a hypo-endemic area in Italy. *One Health*. 2021;13:100320. [PubMed https://doi.org/10.1016/j.onehlt.2021.100320](https://doi.org/10.1016/j.onehlt.2021.100320)
20. Vuitton DA, Zhou H, Bresson-Hadni S, Wang Q, Piarroux M, Raoul F, et al. Epidemiology of alveolar echinococcosis with particular reference to China and Europe. *Parasitology*. 2003;127(Suppl):S87–107. [PubMed https://doi.org/10.1017/S0031182003004153](https://doi.org/10.1017/S0031182003004153)
21. Schmidberger J, Kratzer W, Stark K, Grüner B; Echinococcosis Working Group. Alveolar echinococcosis in Germany, 1992-2016. An update based on the newly established national AE database. *Infection*. 2018;46:197–206. [PubMed https://doi.org/10.1007/s15010-017-1094-0](https://doi.org/10.1007/s15010-017-1094-0)
